# Supplementary material for: Pregnancy-induced gene expression changes in vivo among women with rheumatoid arthritis: a pilot study
Source: Springer Nature journal article supplement (doi:10.1186/s13075-017-1312-2), 2017-05-25
Supplement: MOESM1 [file 13075_2017_1312_MOESM1_ESM.pdf]

**Table S1**

|          | RA improved (n=8) |          |          | RA worsened (n=3) |          |          | Healthy (n=5) |          |          |
|----------|-------------------|----------|----------|-------------------|----------|----------|---------------|----------|----------|
| Genes    | FC                | p-value  | q-value  | FC                | p-value  | q-value  | FC            | p-value  | q-value  |
| ABCA13   | 6.0               | 1.24E-15 | 4.21E-13 | 8.2               | 3.72E-08 | 2.72E-05 | 10.0          | 1.02E-24 | 1.41E-21 |
| ABCG1    | 0.5               | 1.23E-10 | 1.54E-08 | 0.9               | 7.51E-01 | 1.00E+00 | 0.7           | 1.31E-02 | 6.58E-02 |
| ACKR1    | 2.8               | 4.02E-11 | 5.57E-09 | 2.3               | 6.18E-02 | 9.47E-01 | 2.8           | 4.22E-06 | 1.09E-04 |
| AIM2     | 2.1               | 1.96E-05 | 7.24E-04 | 1.5               | 3.80E-01 | 1.00E+00 | 1.7           | 9.42E-05 | 1.46E-03 |
| ALAS2    | 2.7               | 4.70E-14 | 1.09E-11 | 3.7               | 5.19E-02 | 9.08E-01 | 3.7           | 9.50E-10 | 7.61E-08 |
| ANK1     | 2.4               | 1.57E-11 | 2.27E-09 | 2.9               | 1.96E-02 | 6.32E-01 | 3.1           | 1.41E-13 | 3.05E-11 |
| ANXA3    | 2.7               | 3.55E-06 | 1.60E-04 | 4.1               | 4.28E-03 | 2.85E-01 | 5.0           | 6.76E-28 | 1.34E-24 |
| AQP1     | 2.0               | 2.93E-08 | 2.27E-06 | 1.9               | 7.79E-02 | 1.00E+00 | 2.8           | 1.93E-10 | 1.90E-08 |
| ARHGEF12 | 2.4               | 1.00E-18 | 7.33E-16 | 2.1               | 5.89E-02 | 9.44E-01 | 1.8           | 1.94E-06 | 5.69E-05 |
| ARHGEF37 | 2.5               | 8.27E-09 | 7.45E-07 | 2.1               | 3.21E-02 | 7.78E-01 | 2.7           | 1.82E-06 | 5.38E-05 |
| ARL4A    | 2.3               | 6.84E-16 | 2.53E-13 | 1.9               | 2.68E-02 | 7.32E-01 | 2.0           | 5.73E-05 | 9.64E-04 |
| ARL6IP1  | 2.0               | 2.38E-12 | 3.79E-10 | 1.4               | 2.57E-01 | 1.00E+00 | 1.5           | 6.54E-03 | 3.98E-02 |
| BCL2L1   | 2.1               | 2.69E-11 | 3.81E-09 | 1.9               | 2.18E-01 | 1.00E+00 | 2.4           | 1.13E-08 | 6.60E-07 |
| BNIP3L   | 2.2               | 7.13E-10 | 7.49E-08 | 1.4               | 5.44E-01 | 1.00E+00 | 2.0           | 2.04E-04 | 2.73E-03 |
| BPGM     | 3.1               | 3.02E-25 | 5.23E-22 | 2.9               | 8.99E-03 | 4.30E-01 | 3.0           | 1.22E-11 | 1.74E-09 |
| BPI      | 2.5               | 1.25E-05 | 4.93E-04 | 5.1               | 6.26E-08 | 4.34E-05 | 4.8           | 1.32E-11 | 1.87E-09 |
| C9orf78  | 2.4               | 2.05E-15 | 6.45E-13 | 1.7               | 7.48E-02 | 1.00E+00 | 2.7           | 1.37E-14 | 3.21E-12 |
| CA1      | 4.8               | 0.00E+00 | 0.00E+00 | 3.6               | 6.36E-03 | 3.61E-01 | 5.3           | 5.93E-15 | 1.52E-12 |
| CAMP     | 6.5               | 1.15E-14 | 2.90E-12 | 13.7              | 6.19E-26 | 8.58E-22 | 17.8          | 2.22E-31 | 1.03E-27 |
| CASP5    | 2.2               | 8.37E-04 | 1.49E-02 | 1.4               | 5.78E-01 | 1.00E+00 | 1.8           | 1.05E-05 | 2.36E-04 |
| CCDC176  | 2.8               | 9.58E-33 | 3.32E-29 | 2.1               | 6.41E-03 | 3.62E-01 | 2.9           | 7.82E-12 | 1.15E-09 |
| CD177    | 4.2               | 3.00E-04 | 6.82E-03 | 15.4              | 5.53E-05 | 1.28E-02 | 14.2          | 1.55E-29 | 5.38E-26 |
| CD24     | 3.1               | 3.08E-10 | 3.50E-08 | 2.7               | 7.04E-06 | 2.50E-03 | 2.7           | 2.32E-13 | 4.73E-11 |
| CDC42BPA | 2.1               | 1.34E-12 | 2.21E-10 | 1.6               | 5.46E-02 | 9.24E-01 | 1.8           | 4.27E-05 | 7.63E-04 |
| CDK1     | 2.2               | 6.94E-07 | 3.82E-05 | 2.2               | 4.89E-03 | 3.09E-01 | 1.0           | 9.43E-01 | 9.73E-01 |
| CEACAM6  | 2.5               | 3.82E-07 | 2.30E-05 | 3.9               | 1.78E-05 | 5.03E-03 | 4.7           | 2.71E-11 | 3.58E-09 |
| CEACAM8  | 4.7               | 3.01E-12 | 4.69E-10 | 6.5               | 5.07E-11 | 1.00E-07 | 7.3           | 3.94E-16 | 1.33E-13 |
| CEBPE    | 2.2               | 5.88E-05 | 1.84E-03 | 1.8               | 1.31E-02 | 5.09E-01 | 2.5           | 2.54E-12 | 4.24E-10 |
| CETN2    | 2.3               | 4.72E-10 | 5.15E-08 | 1.9               | 1.82E-02 | 6.13E-01 | 2.3           | 4.77E-09 | 3.06E-07 |
| CHIT1    | 2.3               | 7.90E-07 | 4.28E-05 | 3.4               | 3.10E-08 | 2.53E-05 | 3.4           | 3.01E-18 | 1.23E-15 |
| CISD2    | 2.1               | 4.46E-19 | 3.44E-16 | 1.9               | 3.43E-02 | 7.92E-01 | 1.9           | 4.22E-05 | 7.56E-04 |
| CMPK2    | 2.3               | 2.69E-04 | 6.23E-03 | 0.5               | 2.92E-01 | 1.00E+00 | 0.6           | 1.77E-02 | 8.06E-02 |
| CRISP3   | 7.1               | 1.43E-21 | 1.66E-18 | 12.5              | 3.14E-19 | 1.45E-15 | 18.9          | 2.74E-28 | 6.33E-25 |
| CTNNAL1  | 2.2               | 5.04E-21 | 4.99E-18 | 3.0               | 2.76E-06 | 1.16E-03 | 2.1           | 1.63E-06 | 4.96E-05 |
| CTSE     | 2.5               | 7.60E-15 | 1.99E-12 | 1.6               | 2.46E-01 | 1.00E+00 | 1.8           | 5.40E-04 | 5.95E-03 |
| DAAM2    | 0.4               | 4.21E-03 | 4.66E-02 | 1.5               | 2.70E-01 | 1.00E+00 | 1.5           | 1.51E-02 | 7.25E-02 |
| DCAF12   | 2.2               | 2.81E-13 | 5.41E-11 | 2.0               | 2.17E-01 | 1.00E+00 | 2.0           | 5.09E-05 | 8.78E-04 |
| DEFA1    | 6.8               | 4.09E-10 | 4.54E-08 | 9.7               | 3.78E-09 | 4.76E-06 | 20.8          | 3.21E-18 | 1.27E-15 |
| DEFA1B   | 7.5               | 2.61E-08 | 2.04E-06 | 7.5               | 7.19E-09 | 7.12E-06 | 14.8          | 1.30E-15 | 3.85E-13 |
| DEFA3    | 7.5               | 1.88E-09 | 1.91E-07 | 8.4               | 1.54E-09 | 2.13E-06 | 17.0          | 9.94E-16 | 3.07E-13 |
| DPCD     | 2.1               | 3.11E-08 | 2.38E-06 | 1.1               | 7.98E-01 | 1.00E+00 | 1.7           | 2.18E-04 | 2.88E-03 |
| DSC2     | 2.2               | 8.62E-05 | 2.54E-03 | 2.9               | 1.15E-02 | 4.88E-01 | 3.3           | 1.87E-22 | 1.36E-19 |
| DYRK3    | 2.7               | 2.87E-22 | 3.61E-19 | 2.3               | 7.63E-03 | 3.93E-01 | 2.3           | 2.40E-06 | 6.69E-05 |
| E2F2     | 2.4               | 2.57E-10 | 2.95E-08 | 1.8               | 1.64E-01 | 1.00E+00 | 2.2           | 9.12E-07 | 3.07E-05 |
| EPB41    | 2.3               | 2.73E-13 | 5.33E-11 | 1.8               | 2.91E-01 | 1.00E+00 | 2.1           | 6.45E-07 | 2.25E-05 |
| EPB42    | 2.9               | 2.68E-20 | 2.32E-17 | 2.2               | 2.70E-02 | 7.33E-01 | 3.4           | 1.13E-15 | 3.41E-13 |

| Genes     | RA improved (n=8) |          |          | RA worsened (n=3) |          |          | Healthy (n=5) |          |          |
|-----------|-------------------|----------|----------|-------------------|----------|----------|---------------|----------|----------|
|           | FC                | p-value  | q-value  | FC                | p-value  | q-value  | FC            | p-value  | q-value  |
| FAM104A   | 2.3               | 1.13E-18 | 7.84E-16 | 1.7               | 1.16E-01 | 1.00E+00 | 2.1           | 2.22E-07 | 9.09E-06 |
| FAM210B   | 2.3               | 1.74E-17 | 8.59E-15 | 2.2               | 8.26E-02 | 1.00E+00 | 2.1           | 9.68E-06 | 2.21E-04 |
| FAM46C    | 3.0               | 1.66E-13 | 3.44E-11 | 2.8               | 1.32E-01 | 1.00E+00 | 2.1           | 6.36E-05 | 1.05E-03 |
| FAT1      | 2.1               | 1.98E-08 | 1.62E-06 | 1.7               | 7.07E-02 | 9.87E-01 | 1.4           | 2.97E-02 | 1.15E-01 |
| FCER1A    | 0.5               | 1.29E-03 | 2.02E-02 | 0.2               | 8.31E-05 | 1.77E-02 | 0.3           | 4.56E-09 | 2.94E-07 |
| FCGR1A    | 2.1               | 3.82E-04 | 8.32E-03 | 2.1               | 7.81E-02 | 1.00E+00 | 1.8           | 1.21E-06 | 3.88E-05 |
| FCGR1B    | 2.1               | 1.64E-04 | 4.26E-03 | 2.1               | 4.88E-02 | 8.94E-01 | 1.9           | 9.20E-07 | 3.09E-05 |
| FCGR1C    | 2.2               | 9.82E-04 | 1.66E-02 | 2.1               | 5.92E-02 | 9.45E-01 | 1.8           | 2.91E-05 | 5.51E-04 |
| FECH      | 2.7               | 1.09E-12 | 1.82E-10 | 2.7               | 6.15E-02 | 9.47E-01 | 2.3           | 3.79E-07 | 1.45E-05 |
| FFAR3     | 2.7               | 5.12E-04 | 1.03E-02 | 1.1               | 8.43E-01 | 1.00E+00 | 2.2           | 4.48E-06 | 1.15E-04 |
| FKBP1B    | 2.1               | 5.24E-09 | 4.82E-07 | 1.4               | 3.37E-01 | 1.00E+00 | 1.8           | 7.86E-04 | 7.96E-03 |
| GALNT14   | 2.4               | 6.50E-07 | 3.59E-05 | 5.2               | 6.71E-08 | 4.43E-05 | 4.1           | 2.40E-19 | 1.15E-16 |
| GCLC      | 2.0               | 2.83E-15 | 8.36E-13 | 1.8               | 1.51E-02 | 5.54E-01 | 1.6           | 1.22E-04 | 1.81E-03 |
| GMPR      | 2.3               | 1.87E-17 | 8.81E-15 | 2.4               | 1.50E-02 | 5.54E-01 | 3.2           | 3.61E-16 | 1.25E-13 |
| GPX1      | 2.3               | 1.89E-10 | 2.26E-08 | 1.6               | 2.53E-01 | 1.00E+00 | 2.5           | 5.20E-12 | 8.11E-10 |
| GSPT1     | 2.2               | 6.38E-14 | 1.40E-11 | 1.3               | 5.15E-01 | 1.00E+00 | 1.9           | 1.87E-06 | 5.52E-05 |
| GYPA      | 2.0               | 4.12E-13 | 7.62E-11 | 1.5               | 9.85E-02 | 1.00E+00 | 2.2           | 2.54E-05 | 4.92E-04 |
| GYPB      | 2.2               | 7.71E-11 | 1.01E-08 | 1.3               | 3.94E-01 | 1.00E+00 | 2.0           | 3.07E-03 | 2.24E-02 |
| HEMGN     | 2.6               | 2.18E-18 | 1.44E-15 | 1.7               | 2.02E-01 | 1.00E+00 | 2.3           | 4.23E-07 | 1.59E-05 |
| HEPACAM2  | 2.3               | 4.47E-17 | 1.83E-14 | 2.4               | 1.20E-02 | 4.94E-01 | 2.6           | 1.58E-06 | 4.85E-05 |
| HERC5     | 2.2               | 3.60E-03 | 4.18E-02 | 0.5               | 3.19E-01 | 1.00E+00 | 0.6           | 2.59E-02 | 1.05E-01 |
| HIST3H2BB | 2.0               | 6.80E-16 | 2.53E-13 | 1.8               | 7.88E-03 | 3.99E-01 | 2.2           | 2.35E-08 | 1.24E-06 |
| HMBS      | 2.2               | 2.68E-13 | 5.31E-11 | 1.5               | 1.31E-01 | 1.00E+00 | 1.8           | 1.22E-04 | 1.81E-03 |
| IFI27     | 3.4               | 9.41E-08 | 6.53E-06 | 1.8               | 6.88E-02 | 9.83E-01 | 1.6           | 1.59E-02 | 7.51E-02 |
| IFI44     | 2.7               | 1.66E-04 | 4.30E-03 | 0.4               | 2.22E-01 | 1.00E+00 | 0.6           | 2.86E-02 | 1.12E-01 |
| IFI44L    | 2.6               | 4.61E-04 | 9.55E-03 | 0.4               | 2.69E-01 | 1.00E+00 | 0.6           | 2.59E-02 | 1.05E-01 |
| IFIT1     | 2.4               | 3.18E-03 | 3.82E-02 | 0.4               | 2.92E-01 | 1.00E+00 | 0.7           | 1.76E-01 | 3.71E-01 |
| IFIT1B    | 3.2               | 3.51E-29 | 9.74E-26 | 3.1               | 2.58E-05 | 6.88E-03 | 3.0           | 9.41E-13 | 1.74E-10 |
| IGHA2     | 0.4               | 4.47E-03 | 4.84E-02 | 0.7               | 5.53E-01 | 1.00E+00 | 0.6           | 9.40E-03 | 5.19E-02 |
| IGHG2     | 0.4               | 1.03E-03 | 1.72E-02 | 0.6               | 1.80E-01 | 1.00E+00 | 0.7           | 2.62E-01 | 4.70E-01 |
| INHBA     | 3.3               | 1.03E-09 | 1.06E-07 | 3.1               | 3.52E-04 | 5.68E-02 | 3.1           | 5.16E-07 | 1.87E-05 |
| ITLN1     | 4.6               | 3.22E-34 | 1.68E-30 | 4.4               | 7.55E-06 | 2.62E-03 | 5.8           | 3.14E-29 | 8.70E-26 |
| KCNH7     | 2.1               | 1.46E-04 | 3.93E-03 | 3.1               | 1.17E-02 | 4.92E-01 | 3.4           | 5.90E-16 | 1.90E-13 |
| KEL       | 2.2               | 1.11E-11 | 1.64E-09 | 2.0               | 8.33E-02 | 1.00E+00 | 2.4           | 3.77E-09 | 2.46E-07 |
| KIF15     | 2.2               | 4.76E-09 | 4.43E-07 | 1.7               | 3.03E-02 | 7.60E-01 | 1.7           | 1.44E-02 | 7.00E-02 |
| KLF1      | 2.6               | 1.78E-20 | 1.65E-17 | 2.2               | 4.25E-02 | 8.50E-01 | 2.7           | 6.98E-06 | 1.69E-04 |
| KRT1      | 2.2               | 1.60E-08 | 1.35E-06 | 2.0               | 1.29E-01 | 1.00E+00 | 2.8           | 7.26E-13 | 1.36E-10 |
| LCN2      | 7.0               | 5.47E-13 | 9.73E-11 | 8.0               | 5.43E-09 | 6.28E-06 | 12.8          | 2.17E-23 | 2.51E-20 |
| LGALS3    | 2.1               | 1.06E-14 | 2.73E-12 | 1.9               | 2.91E-02 | 7.55E-01 | 2.4           | 6.25E-11 | 7.28E-09 |
| LTF       | 8.1               | 1.15E-10 | 1.46E-08 | 16.0              | 3.28E-11 | 7.59E-08 | 24.0          | 5.91E-23 | 5.86E-20 |
| MAOA      | 5.3               | 3.64E-34 | 1.68E-30 | 4.5               | 1.00E-05 | 3.38E-03 | 5.6           | 1.39E-19 | 6.86E-17 |
| MARCH8    | 2.2               | 4.18E-12 | 6.43E-10 | 2.0               | 2.08E-01 | 1.00E+00 | 2.0           | 1.40E-06 | 4.41E-05 |
| MCEMP1    | 2.2               | 1.55E-03 | 2.33E-02 | 5.5               | 1.05E-08 | 9.68E-06 | 5.1           | 1.84E-21 | 1.22E-18 |
| MFSD2B    | 2.3               | 2.59E-14 | 6.31E-12 | 1.6               | 1.40E-01 | 1.00E+00 | 2.2           | 6.34E-10 | 5.26E-08 |
| MKRN1     | 2.2               | 1.95E-10 | 2.31E-08 | 1.9               | 2.57E-01 | 1.00E+00 | 2.2           | 5.22E-07 | 1.89E-05 |
| MMP8      | 15.5              | 1.36E-28 | 3.13E-25 | 20.9              | 2.30E-22 | 1.59E-18 | 31.0          | 6.87E-35 | 4.76E-31 |
| MRC2      | 2.3               | 9.64E-11 | 1.24E-08 | 1.8               | 2.07E-01 | 1.00E+00 | 2.5           | 7.73E-07 | 2.65E-05 |
| MS4A3     | 2.7               | 3.18E-10 | 3.58E-08 | 5.7               | 1.48E-10 | 2.56E-07 | 2.6           | 3.67E-06 | 9.74E-05 |
| MX11      | 2.1               | 1.60E-11 | 2.29E-09 | 2.2               | 8.00E-02 | 1.00E+00 | 1.9           | 1.67E-04 | 2.32E-03 |

| Genes     | RA improved (n=8) |          |          | RA worsened (n=3) |          |          | Healthy (n=5) |          |          |
|-----------|-------------------|----------|----------|-------------------|----------|----------|---------------|----------|----------|
|           | FC                | p-value  | q-value  | FC                | p-value  | q-value  | FC            | p-value  | q-value  |
| MYL4      | 2.8               | 2.17E-15 | 6.67E-13 | 1.8               | 4.20E-02 | 8.50E-01 | 3.2           | 1.00E-13 | 2.24E-11 |
| OLFM4     | 19.1              | 3.91E-21 | 4.18E-18 | 20.2              | 2.13E-18 | 7.39E-15 | 42.8          | 0.00E+00 | 0.00E+00 |
| OLR1      | 2.1               | 5.78E-07 | 3.30E-05 | 2.2               | 4.07E-04 | 6.05E-02 | 1.8           | 4.88E-05 | 8.51E-04 |
| OR2W3     | 2.4               | 1.23E-17 | 6.34E-15 | 2.3               | 2.90E-02 | 7.55E-01 | 3.2           | 5.16E-15 | 1.35E-12 |
| OSBP2     | 2.8               | 4.16E-17 | 1.80E-14 | 2.6               | 2.37E-02 | 6.84E-01 | 3.6           | 5.42E-13 | 1.04E-10 |
| PAQR9     | 2.4               | 4.32E-08 | 3.17E-06 | 1.4               | 3.21E-01 | 1.00E+00 | 2.2           | 1.25E-04 | 1.84E-03 |
| PITHD1    | 3.0               | 3.53E-18 | 2.22E-15 | 2.4               | 3.65E-02 | 8.11E-01 | 2.7           | 1.39E-08 | 7.86E-07 |
| PLEK2     | 2.0               | 5.60E-18 | 3.11E-15 | 1.9               | 2.75E-02 | 7.37E-01 | 2.4           | 1.34E-09 | 1.05E-07 |
| PLSCR1    | 2.1               | 8.05E-06 | 3.35E-04 | 1.3               | 6.54E-01 | 1.00E+00 | 1.2           | 1.30E-01 | 3.06E-01 |
| PLSCR2    | 2.2               | 1.18E-06 | 6.02E-05 | 1.4               | 4.92E-01 | 1.00E+00 | 1.3           | 1.38E-01 | 3.18E-01 |
| PLSCR4    | 2.8               | 1.91E-17 | 8.81E-15 | 1.4               | 4.10E-01 | 1.00E+00 | 2.0           | 1.23E-05 | 2.67E-04 |
| PNP       | 2.0               | 5.17E-15 | 1.43E-12 | 1.9               | 6.63E-03 | 3.64E-01 | 1.7           | 6.15E-06 | 1.51E-04 |
| PRDX2     | 2.2               | 2.88E-13 | 5.48E-11 | 1.7               | 4.87E-02 | 8.93E-01 | 2.9           | 1.00E-22 | 8.18E-20 |
| PTX3      | 2.6               | 1.77E-07 | 1.14E-05 | 3.9               | 2.57E-06 | 1.11E-03 | 2.5           | 2.16E-07 | 8.90E-06 |
| RAB3IL1   | 2.0               | 8.84E-09 | 7.81E-07 | 1.9               | 1.67E-01 | 1.00E+00 | 2.7           | 2.39E-08 | 1.25E-06 |
| RAP1GAP   | 2.5               | 8.97E-08 | 6.25E-06 | 4.5               | 1.97E-05 | 5.47E-03 | 5.3           | 4.75E-24 | 5.99E-21 |
| RBM38     | 2.0               | 4.58E-09 | 4.29E-07 | 1.9               | 1.78E-01 | 1.00E+00 | 2.5           | 3.28E-09 | 2.22E-07 |
| RETN      | 4.7               | 1.60E-08 | 1.35E-06 | 9.5               | 5.44E-14 | 1.51E-10 | 6.1           | 5.30E-23 | 5.65E-20 |
| RGCC      | 2.1               | 3.83E-15 | 1.08E-12 | 1.4               | 1.11E-01 | 1.00E+00 | 1.5           | 9.41E-03 | 5.19E-02 |
| RGS10     | 2.3               | 3.34E-17 | 1.50E-14 | 1.5               | 1.26E-01 | 1.00E+00 | 2.0           | 2.54E-08 | 1.32E-06 |
| RHAG      | 2.1               | 1.97E-10 | 2.31E-08 | 1.7               | 8.08E-02 | 1.00E+00 | 1.8           | 1.29E-02 | 6.48E-02 |
| RHCE      | 2.3               | 2.86E-12 | 4.50E-10 | 2.2               | 3.29E-03 | 2.43E-01 | 1.9           | 9.23E-06 | 2.12E-04 |
| RIOK3     | 2.2               | 3.38E-14 | 8.09E-12 | 2.1               | 9.53E-02 | 1.00E+00 | 1.8           | 1.05E-04 | 1.59E-03 |
| RNF14     | 2.1               | 8.48E-14 | 1.81E-11 | 1.6               | 1.12E-01 | 1.00E+00 | 1.6           | 1.07E-03 | 1.01E-02 |
| RPIA      | 2.1               | 2.29E-15 | 6.90E-13 | 1.8               | 8.51E-02 | 1.00E+00 | 1.5           | 4.42E-03 | 2.95E-02 |
| RPL21     | 2.0               | 3.87E-07 | 2.31E-05 | 1.6               | 1.40E-01 | 1.00E+00 | 2.2           | 4.22E-11 | 5.18E-09 |
| RPL36AL   | 2.1               | 1.29E-04 | 3.54E-03 | 1.6               | 1.79E-01 | 1.00E+00 | 2.3           | 1.61E-08 | 8.91E-07 |
| RPL7      | 2.2               | 4.98E-08 | 3.56E-06 | 1.8               | 1.74E-01 | 1.00E+00 | 2.5           | 3.37E-13 | 6.76E-11 |
| RSAD2     | 2.6               | 3.77E-03 | 4.31E-02 | 0.4               | 2.13E-01 | 1.00E+00 | 0.4           | 3.13E-03 | 2.28E-02 |
| S100A12   | 2.2               | 2.98E-04 | 6.81E-03 | 5.3               | 3.57E-04 | 5.69E-02 | 5.3           | 1.57E-22 | 1.21E-19 |
| S100A8    | 2.2               | 5.61E-05 | 1.78E-03 | 4.9               | 2.50E-03 | 2.14E-01 | 4.9           | 9.33E-25 | 1.41E-21 |
| SELENBP1  | 2.8               | 4.05E-18 | 2.34E-15 | 3.0               | 2.04E-02 | 6.41E-01 | 4.2           | 4.43E-19 | 1.98E-16 |
| SELK      | 2.1               | 3.65E-13 | 6.85E-11 | 1.6               | 3.66E-02 | 8.11E-01 | 2.1           | 1.04E-10 | 1.07E-08 |
| SERPINB10 | 2.3               | 3.63E-06 | 1.62E-04 | 3.1               | 1.66E-05 | 4.99E-03 | 2.8           | 8.74E-08 | 4.07E-06 |
| SIAH2     | 2.3               | 6.24E-16 | 2.47E-13 | 2.4               | 3.35E-02 | 7.85E-01 | 1.9           | 9.40E-07 | 3.13E-05 |
| SIGLEC1   | 3.1               | 1.55E-05 | 5.90E-04 | 0.5               | 3.41E-01 | 1.00E+00 | 0.7           | 2.74E-01 | 4.83E-01 |
| SLC14A1   | 2.5               | 2.17E-22 | 3.01E-19 | 2.0               | 2.37E-02 | 6.84E-01 | 2.1           | 1.08E-06 | 3.53E-05 |
| SLC1A5    | 2.1               | 2.05E-15 | 6.45E-13 | 2.1               | 2.09E-02 | 6.47E-01 | 2.1           | 1.87E-09 | 1.40E-07 |
| SLC45A3   | 0.4               | 8.12E-08 | 5.69E-06 | 0.4               | 2.06E-03 | 1.94E-01 | 0.3           | 3.20E-11 | 4.15E-09 |
| SLC4A1    | 2.5               | 4.25E-14 | 9.99E-12 | 2.9               | 6.21E-02 | 9.47E-01 | 3.8           | 3.73E-15 | 1.02E-12 |
| SLC6A8    | 2.0               | 5.44E-14 | 1.24E-11 | 1.8               | 1.24E-01 | 1.00E+00 | 2.3           | 2.28E-06 | 6.47E-05 |
| SLFN14    | 2.5               | 1.09E-15 | 3.79E-13 | 2.0               | 5.13E-03 | 3.16E-01 | 1.9           | 9.11E-07 | 3.07E-05 |
| SLPI      | 2.4               | 2.39E-04 | 5.69E-03 | 2.2               | 7.51E-02 | 1.00E+00 | 4.3           | 1.83E-27 | 3.17E-24 |
| SNCA      | 2.3               | 1.79E-10 | 2.18E-08 | 1.6               | 3.62E-01 | 1.00E+00 | 2.3           | 1.78E-05 | 3.69E-04 |
| SOX6      | 2.0               | 1.28E-13 | 2.69E-11 | 1.6               | 1.35E-01 | 1.00E+00 | 1.8           | 2.10E-05 | 4.19E-04 |
| SPTA1     | 2.7               | 6.95E-16 | 2.53E-13 | 2.4               | 1.35E-03 | 1.53E-01 | 2.8           | 1.43E-13 | 3.05E-11 |
| SPTB      | 2.2               | 2.19E-10 | 2.55E-08 | 3.0               | 4.62E-03 | 2.98E-01 | 3.6           | 2.42E-20 | 1.34E-17 |
| SRRD      | 2.1               | 1.04E-17 | 5.53E-15 | 1.5               | 1.18E-01 | 1.00E+00 | 1.7           | 5.48E-05 | 9.31E-04 |
| STOM      | 2.3               | 3.27E-15 | 9.45E-13 | 1.8               | 9.82E-02 | 1.00E+00 | 1.8           | 2.79E-07 | 1.12E-05 |

| Genes   | RA improved (n=8) |          |          | RA worsened (n=3) |          |          | Healthy (n=5) |          |          |
|---------|-------------------|----------|----------|-------------------|----------|----------|---------------|----------|----------|
|         | FC                | p-value  | q-value  | FC                | p-value  | q-value  | FC            | p-value  | q-value  |
| STRADB  | 2.2               | 5.07E-12 | 7.65E-10 | 1.8               | 2.52E-01 | 1.00E+00 | 1.9           | 1.25E-03 | 1.13E-02 |
| TAS2R40 | 2.6               | 3.14E-06 | 1.44E-04 | 4.4               | 7.33E-07 | 4.07E-04 | 5.2           | 5.19E-21 | 3.13E-18 |
| TCN1    | 4.1               | 8.07E-16 | 2.87E-13 | 5.8               | 3.91E-05 | 9.69E-03 | 4.4           | 7.41E-20 | 3.81E-17 |
| TIGD3   | 0.4               | 6.23E-14 | 1.39E-11 | 0.9               | 5.04E-01 | 1.00E+00 | 0.9           | 5.50E-01 | 7.28E-01 |
| TLR5    | 2.0               | 1.43E-04 | 3.84E-03 | 2.6               | 1.14E-02 | 4.84E-01 | 2.3           | 9.28E-11 | 9.82E-09 |
| TMCC2   | 2.7               | 3.96E-18 | 2.34E-15 | 2.9               | 3.27E-03 | 2.43E-01 | 3.1           | 1.27E-12 | 2.31E-10 |
| TMOD1   | 2.7               | 5.47E-25 | 8.43E-22 | 2.4               | 2.44E-02 | 6.88E-01 | 2.6           | 4.75E-15 | 1.27E-12 |
| TNS1    | 2.1               | 7.00E-11 | 9.33E-09 | 2.1               | 1.50E-01 | 1.00E+00 | 2.6           | 2.99E-09 | 2.09E-07 |
| TOP2A   | 2.0               | 7.03E-07 | 3.85E-05 | 2.5               | 8.81E-05 | 1.85E-02 | 1.1           | 7.88E-01 | 8.88E-01 |
| TRAK2   | 2.1               | 2.44E-13 | 4.90E-11 | 1.7               | 1.40E-01 | 1.00E+00 | 1.8           | 3.16E-05 | 5.91E-04 |
| TRIM10  | 2.7               | 5.44E-20 | 4.44E-17 | 2.5               | 6.23E-03 | 3.57E-01 | 3.1           | 1.40E-15 | 4.04E-13 |
| TRIM58  | 2.4               | 4.48E-17 | 1.83E-14 | 2.7               | 5.52E-02 | 9.29E-01 | 2.7           | 1.97E-10 | 1.92E-08 |
| TSPAN5  | 2.0               | 8.06E-13 | 1.40E-10 | 1.7               | 2.01E-01 | 1.00E+00 | 1.7           | 1.07E-03 | 1.01E-02 |
| UBB     | 2.6               | 1.07E-08 | 9.13E-07 | 1.6               | 3.43E-01 | 1.00E+00 | 4.9           | 3.81E-11 | 4.74E-09 |
| UBE2O   | 2.1               | 1.71E-13 | 3.49E-11 | 1.9               | 4.43E-02 | 8.60E-01 | 2.5           | 1.02E-18 | 4.30E-16 |
| XK      | 3.3               | 6.46E-27 | 1.28E-23 | 2.6               | 1.45E-02 | 5.45E-01 | 2.6           | 1.53E-07 | 6.67E-06 |
| YOD1    | 2.0               | 1.71E-10 | 2.10E-08 | 1.8               | 2.63E-01 | 1.00E+00 | 1.7           | 4.27E-03 | 2.89E-02 |
