# Supplementary material for: Pregnancy-induced gene expression changes in vivo among women with rheumatoid arthritis: a pilot study
Source: Springer Nature journal article supplement (doi:10.1186/s13075-017-1312-2), 2017-05-25

# Figure S1

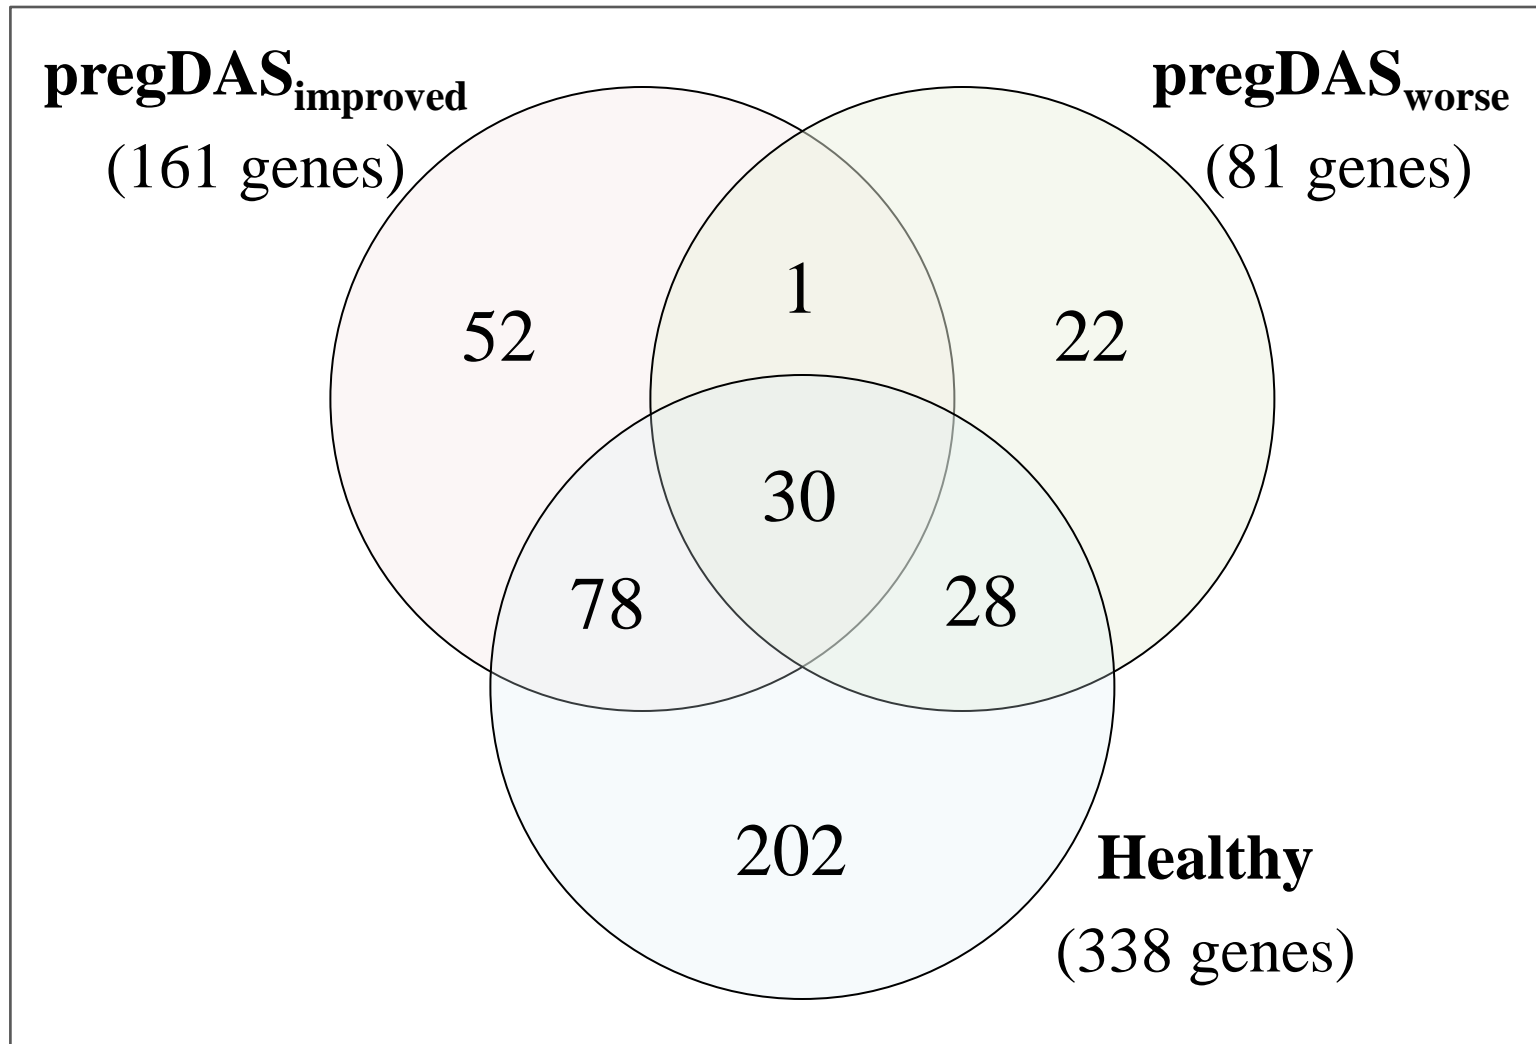

Supplement: MOESM2 [file 12316058]
